# Supplementary material for: Grammar rules and exceptions for the language of transcriptional activation domains
Source: PubMed Central journal article supplement — iScience. 2024 Sep 26;27(11):111057. doi: 10.1016/j.isci.2024.111057 (PMC11546935; doi:10.1016/j.isci.2024.111057), 2024-09-26
Supplement: mmc1.pdf [file mmc1.pdf]

**iScience, Volume 27**

**Supplemental information**

**Grammar rules and exceptions for the language  
of transcriptional activation domains**

**David G. Cooper, Tamara Y. Erkina, Bradley K. Broyles, Caleb A. Class, and Alexandre M. Erkine**

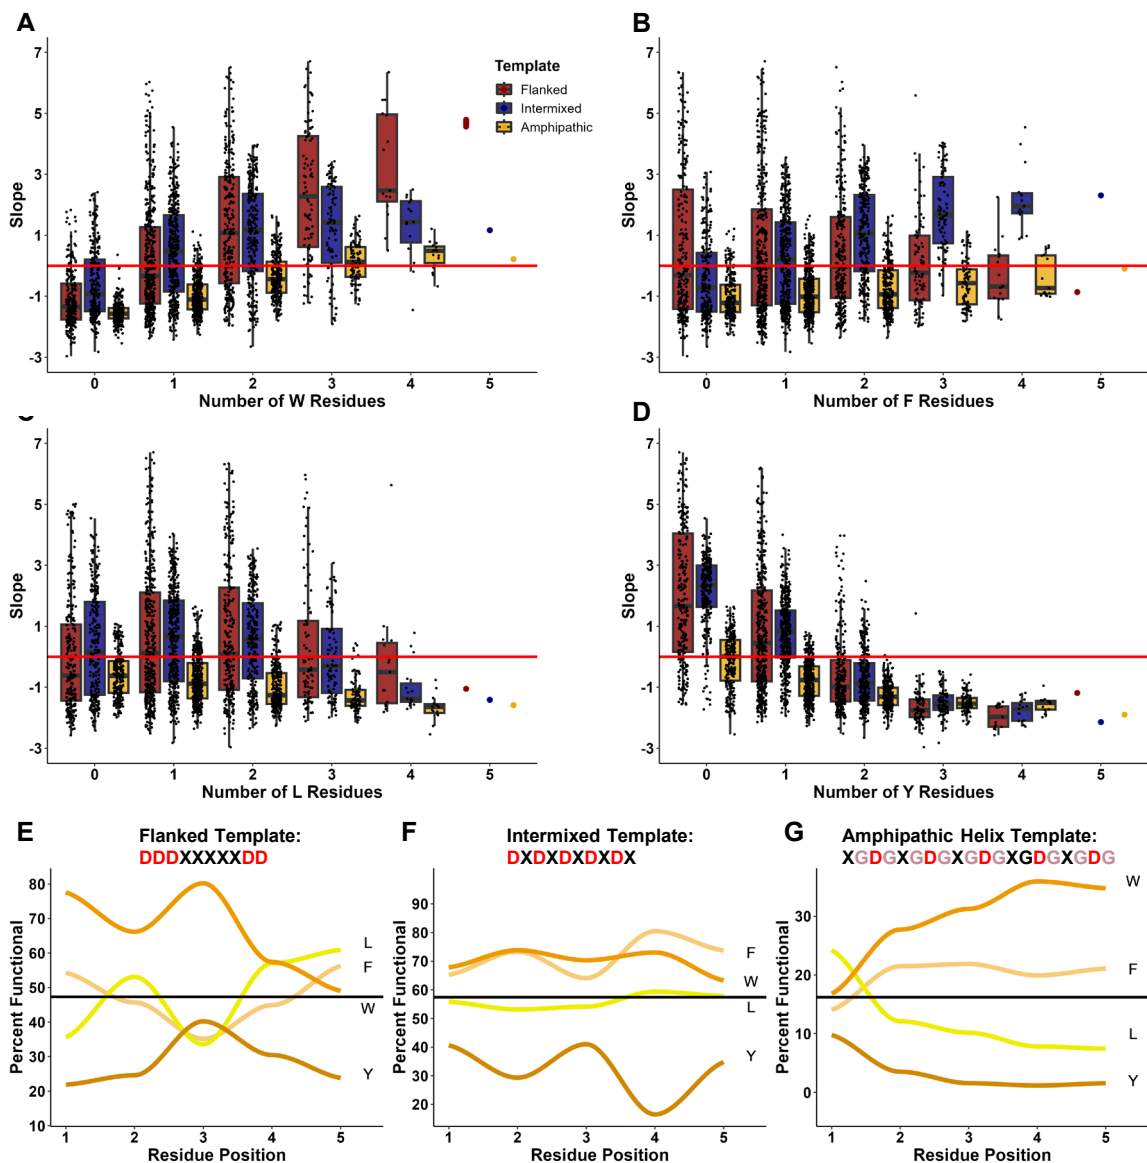

**Figure S1. Compositional and positional analysis of functional AD sequences in context of flanked, intermixed, and amphipathic helix templates, related to Figure 1.** **A-D** – Effect of number of hydrophobic residues: W (panel A), F (panel B), L (panel C), or Y (panel D) within three sequence templates: flanked template (DDDXXXXDD, red), intermixed template (DXDXDXDX, blue), and amphipathic helix template (XGDGXGDGXGDGXGDGXGDG, yellow). X-axis: number of residues. Y-axis: growth slope of cells carrying the corresponding sequences. **E-G** – Effect of position of hydrophobic residues: W, F, L, or Y within three sequence templates: flanked template (panel E), intermixed template (panel F), and amphipathic helix template (panel G). X-axis: position of W, F, L, or Y residues within the 5 X positions of the template sequence. Y-axis: percent of cells carrying the corresponding sequences that have a growth slope above the functionality threshold. Horizontal lines correspond to the total percent functionality of each template dataset.

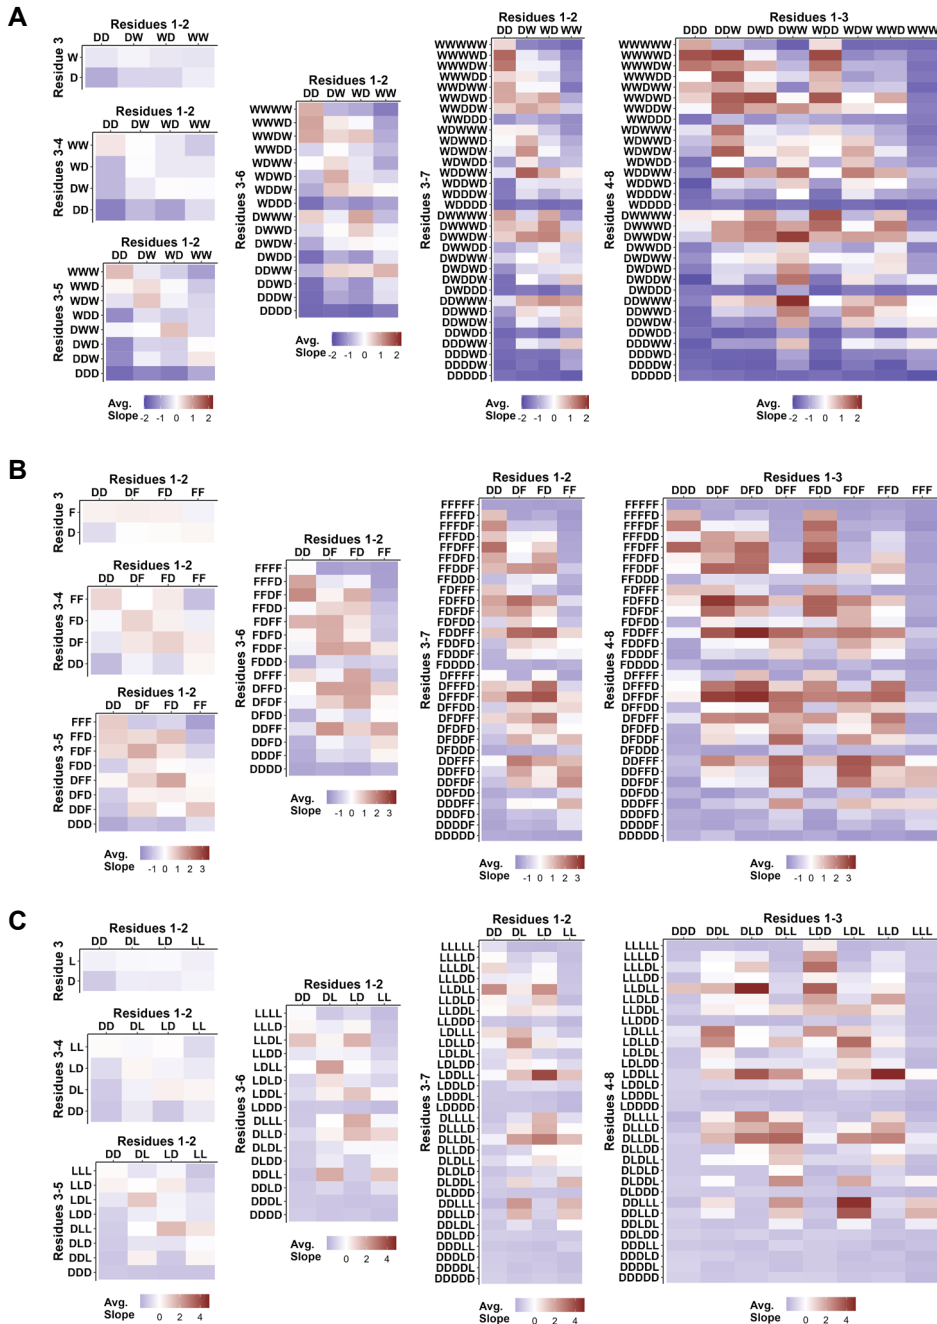

**Figure S2. Search for SLiMs in WD10, FD10, and LD10 datasets identifies a spectrum of short sequences enriched for *in vivo* active ADs, related to Figure 4. A-C – AD activity heat maps for all possible 3 to 8-residue long sequences for WD10 (panel A), FD10 (panel B), and LD10 (panel C) datasets. Cell shading corresponds to average growth slope for all sequences containing the designated mini-motif short sequence.**

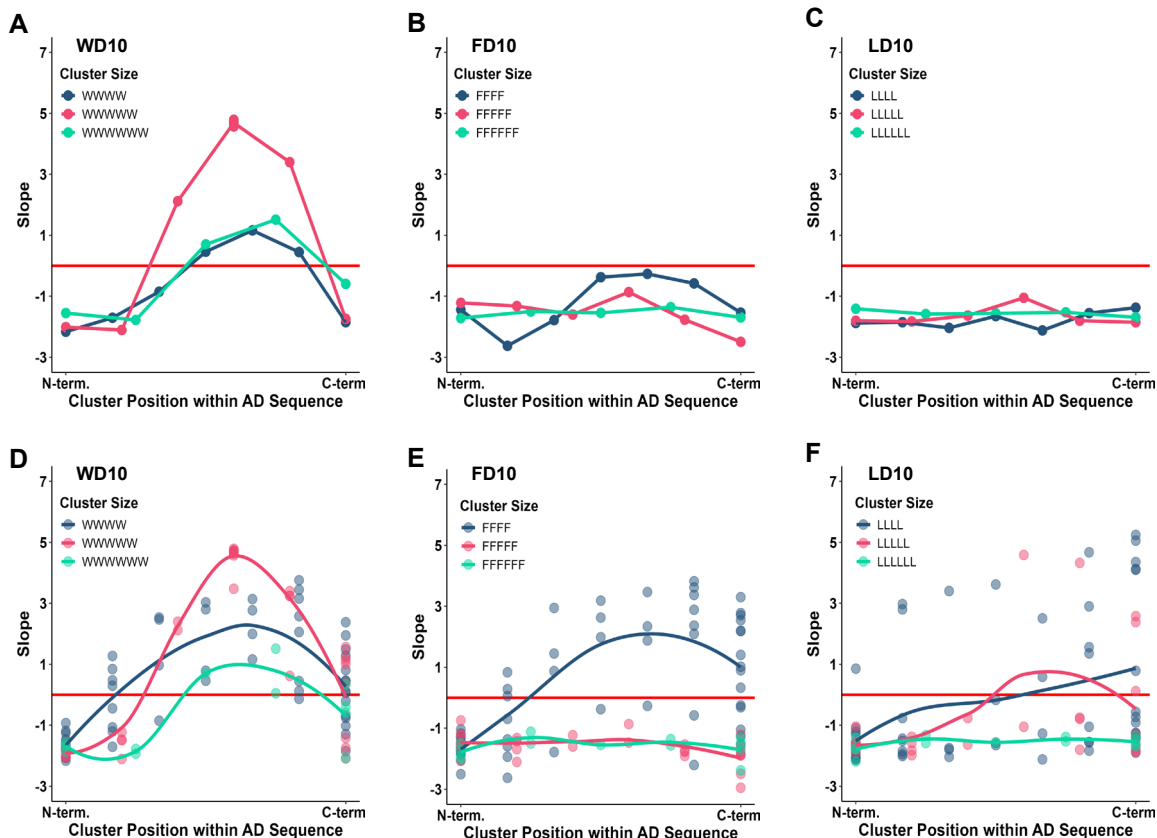

**Figure S3. Activity of sequences containing large clusters of hydrophobic residues, related to Figure 4 and 5.** **A-C** – Sequences with a single hydrophobic cluster flanked entirely by D residues. **D-F** – Sequences with a hydrophobic cluster [defined as a set number of hydrophobics flanked by 2 D residues, or flanked by 1 D residue directly before the edge, or present at either edge of the sequence] with the remaining residues being all possible combinations of hydrophobic and D residues. (extracted from the WD10, FD10, and LD10 sets).

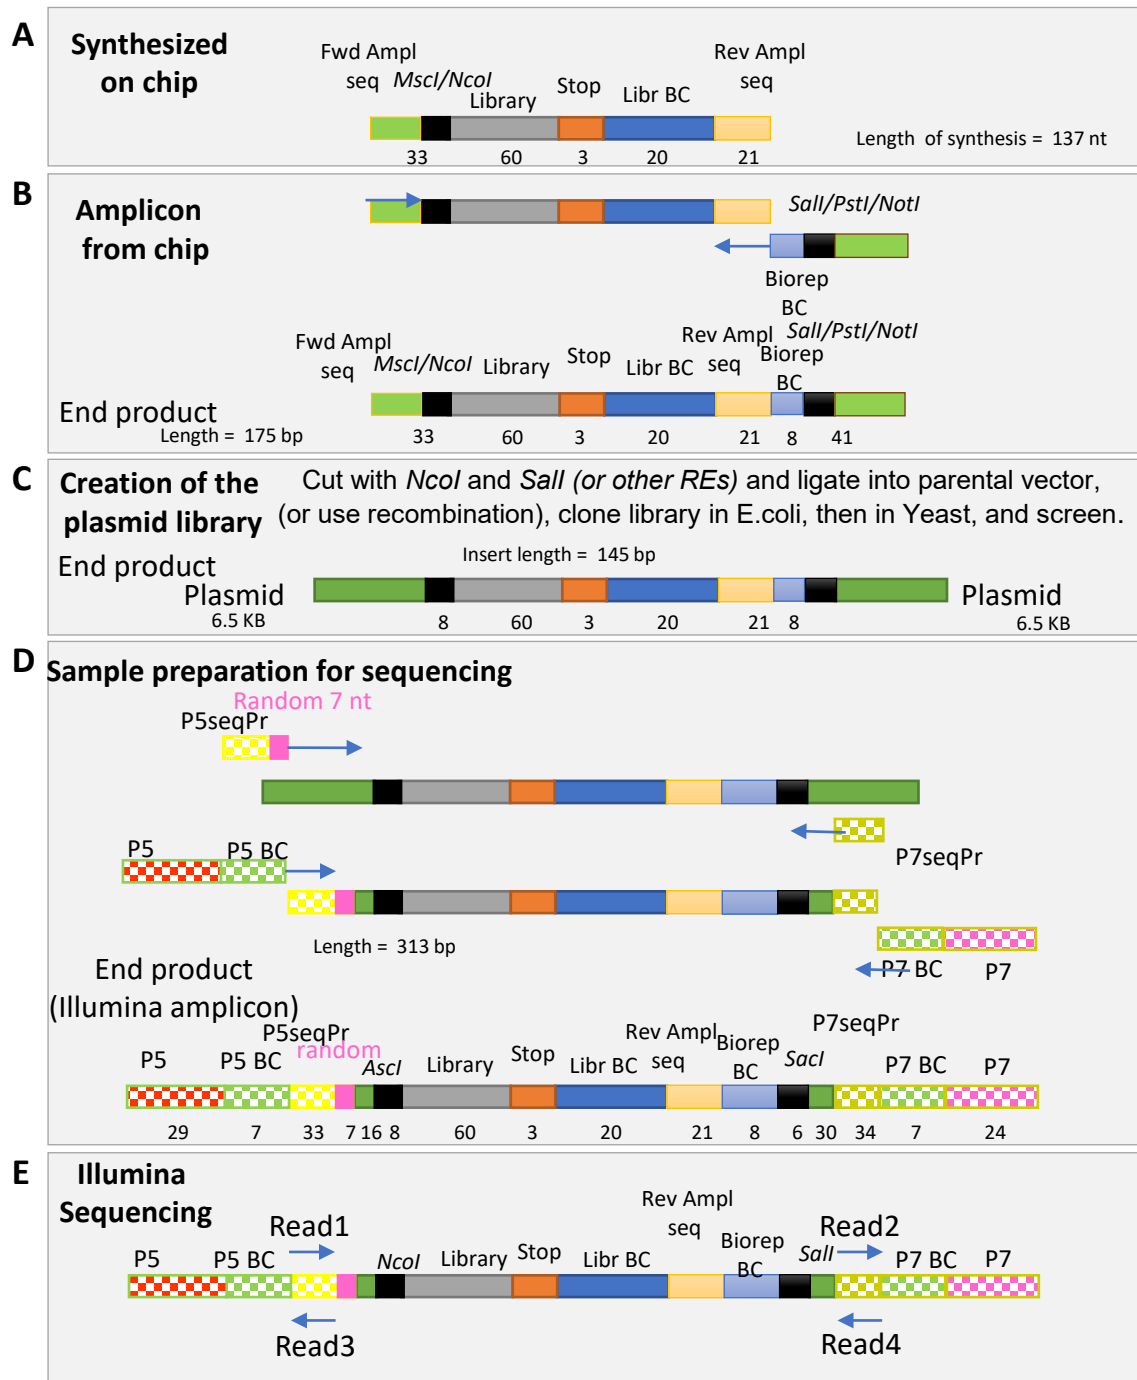

**Figure S4. Schematic representation of wet lab steps for library sample preparations, related to Star Methods.:** **A** – massive parallel synthesis of the design library; **B** – BioRep barcodes appending; **C** – cloning into parental yeast shuttle vector; **D** – sample preparation for NGS Illumina sequencing; **E** – sequencing at Illumina sequencing facility.

| Group    | Flanked            |               | Intermixed         |               | Amphipathic Helix  |               | Number in Group |
|----------|--------------------|---------------|--------------------|---------------|--------------------|---------------|-----------------|
|          | Percent Functional | Average Slope | Percent Functional | Average Slope | Percent Functional | Average Slope |                 |
| W5L0F0Y0 | 100.0              | 4.69          | 100.0              | 1.17          | 100.0              | 0.22          | 1               |
| W4L1F0Y0 | 100.0              | 4.35          | 100.0              | 1.81          | 100.0              | 0.55          | 5               |
| W4L0F1Y0 | 100.0              | 3.29          | 100.0              | 2.03          | 100.0              | 0.66          | 5               |
| W4L0F0Y1 | 100.0              | 2.25          | 60.0               | -0.01         | 20.0               | -0.18         | 5               |
| W3L2F0Y0 | 90.0               | 3.80          | 100.0              | 2.14          | 60.0               | 0.29          | 10              |
| W3L1F1Y0 | 95.0               | 3.44          | 95.0               | 2.31          | 95.0               | 0.64          | 20              |
| W3L1F0Y1 | 90.0               | 2.59          | 75.0               | 0.36          | 40.0               | -0.27         | 20              |
| W3L0F2Y0 | 90.0               | 2.45          | 100.0              | 2.97          | 100.0              | 0.85          | 10              |
| W3L0F1Y1 | 85.0               | 1.50          | 70.0               | 0.70          | 30.0               | -0.08         | 20              |
| W3L0F0Y2 | 50.0               | 0.11          | 0.0                | -1.11         | 0.0                | -0.76         | 10              |
| W2L3F0Y0 | 80.0               | 2.45          | 100.0              | 1.91          | 40.0               | -0.45         | 10              |
| W2L2F1Y0 | 90.0               | 2.78          | 100.0              | 2.40          | 43.3               | 0.10          | 30              |
| W2L2F0Y1 | 70.0               | 1.81          | 80.0               | 0.68          | 3.3                | -0.73         | 30              |
| W2L1F2Y0 | 83.3               | 2.49          | 100.0              | 2.89          | 83.3               | 0.45          | 30              |
| W2L1F1Y1 | 80.0               | 1.72          | 85.0               | 1.08          | 25.0               | -0.38         | 60              |
| W2L1F0Y2 | 46.7               | 0.22          | 13.3               | -0.86         | 0.0                | -1.02         | 30              |
| W2L0F3Y0 | 80.0               | 1.32          | 100.0              | 3.37          | 100.0              | 0.74          | 10              |
| W2L0F2Y1 | 66.7               | 0.62          | 80.0               | 1.59          | 23.3               | -0.15         | 30              |
| W2L0F1Y2 | 30.0               | -0.32         | 43.3               | -0.60         | 0.0                | -0.84         | 30              |
| W2L0F0Y3 | 0.0                | -1.42         | 0.0                | -1.46         | 0.0                | -1.20         | 10              |
| W1L4F0Y0 | 60.0               | 1.18          | 60.0               | -0.17         | 0.0                | -1.48         | 5               |
| W1L3F1Y0 | 65.0               | 1.42          | 90.0               | 1.37          | 5.0                | -0.99         | 20              |
| W1L3F0Y1 | 45.0               | 0.53          | 25.0               | -0.44         | 0.0                | -1.38         | 20              |
| W1L2F2Y0 | 83.3               | 1.66          | 100.0              | 2.26          | 33.3               | -0.44         | 30              |
| W1L2F1Y1 | 58.3               | 0.89          | 83.3               | 0.66          | 0.0                | -1.09         | 60              |
| W1L2F0Y2 | 26.7               | -0.36         | 3.3                | -1.04         | 0.0                | -1.52         | 30              |
| W1L1F3Y0 | 80.0               | 1.29          | 100.0              | 2.77          | 40.0               | -0.02         | 20              |
| W1L1F2Y1 | 60.0               | 0.74          | 93.2               | 1.43          | 3.3                | -0.75         | 60              |
| W1L1F1Y2 | 31.7               | -0.33         | 26.7               | -0.44         | 1.7                | -1.26         | 60              |
| W1L1F0Y3 | 5.0                | -1.35         | 0.0                | -1.52         | 0.0                | -1.55         | 20              |
| W1L0F4Y0 | 60.0               | 0.23          | 100.0              | 3.20          | 100.0              | 0.47          | 5               |
| W1L0F3Y1 | 40.0               | -0.22         | 100.0              | 1.94          | 10.0               | -0.32         | 20              |
| W1L0F2Y2 | 6.7                | -0.90         | 50.0               | -0.06         | 0.0                | -1.02         | 30              |
| W1L0F1Y3 | 0.0                | -1.68         | 0.0                | -1.28         | 0.0                | -1.39         | 20              |
| W1L0F0Y4 | 0.0                | -1.98         | 0.0                | -1.88         | 0.0                | -1.55         | 5               |
| W0L5F0Y0 | 0.0                | -1.05         | 0.0                | -1.42         | 0.0                | -1.59         | 1               |
| W0L4F1Y0 | 20.0               | -0.66         | 0.0                | -1.26         | 0.0                | -1.91         | 5               |
| W0L4F0Y1 | 20.0               | -1.15         | 0.0                | -1.54         | 0.0                | -1.63         | 5               |
| W0L3F2Y0 | 30.0               | -0.20         | 70.0               | 0.21          | 0.0                | -1.44         | 10              |
| W0L3F1Y1 | 10.0               | -0.84         | 0.0                | -1.15         | 0.0                | -1.66         | 20              |
| W0L3F0Y2 | 0.0                | -1.47         | 0.0                | -1.68         | 0.0                | -1.52         | 10              |
| W0L2F3Y0 | 40.0               | -0.03         | 100.0              | 1.36          | 0.0                | -1.33         | 10              |
| W0L2F2Y1 | 26.7               | -0.61         | 53.3               | 0.06          | 0.0                | -1.58         | 30              |
| W0L2F1Y2 | 10.0               | -1.29         | 0.0                | -1.41         | 0.0                | -1.67         | 30              |
| W0L2F0Y3 | 0.0                | -1.77         | 0.0                | -1.74         | 0.0                | -1.67         | 10              |
| W0L1F4Y0 | 40.0               | -0.17         | 100.0              | 2.02          | 0.0                | -0.77         | 5               |
| W0L1F3Y1 | 25.0               | -0.56         | 95.0               | 1.02          | 0.0                | -1.26         | 20              |
| W0L1F2Y2 | 6.7                | -1.20         | 13.3               | -0.68         | 0.0                | -1.59         | 30              |
| W0L1F1Y3 | 0.0                | -1.86         | 0.0                | -1.69         | 0.0                | -1.68         | 20              |
| W0L1F0Y4 | 0.0                | -1.87         | 0.0                | -1.67         | 0.0                | -1.60         | 5               |
| W0L0F5Y0 | 0.0                | -0.87         | 100.0              | 2.31          | 0.0                | -0.10         | 1               |
| W0L0F4Y1 | 20.0               | -1.02         | 100.0              | 1.36          | 20.0               | -0.71         | 5               |
| W0L0F3Y2 | 0.0                | -1.60         | 40.0               | -0.11         | 0.0                | -1.38         | 10              |
| W0L0F2Y3 | 0.0                | -1.88         | 0.0                | -1.27         | 0.0                | -1.52         | 10              |
| W0L0F1Y4 | 0.0                | -2.05         | 0.0                | -1.74         | 0.0                | -1.57         | 5               |
| W0L0F0Y5 | 0.0                | -1.19         | 0.0                | -2.14         | 0.0                | -1.90         | 1               |

**Table S1. Diverse sequence compositions produce functional ADs across three templates, related to Figure 2. Templates** – Flanked (DDDXXXXDD), Intermixed (DXDXDXDX), and Amphipathic Helix (XGDGXGDGXGDGXGDGXGDG). **Group** – Description of sequence composition with numbers of each residue (W, L, F, and Y). **Number in Group** – Number of unique sequences with a given sequence composition. **Percent Functional** – Percent of cells carrying the corresponding sequences that have a growth slope above the functionality threshold. Cells shaded with a gradient from 100% (green) to 0% (red). **Average Slope** – Average growth slope across cells carrying the corresponding sequences. Cells shaded with a gradient from high positive slope (blue) to low negative slope (red).

|      | Number of hydrophobics | Deviation from Balance | Average position of hydrophobics | Clustering (Patterning Parameter) |
|------|------------------------|------------------------|----------------------------------|-----------------------------------|
| WD10 | 10.67                  | -9.67                  | 11.18                            | -4.37                             |
| FD10 | 11.48                  | -18.19                 | 16.13                            | -16.42                            |
| LD10 | 17.76                  | -8.93                  | 7.87                             | -8.16                             |

**Table S2. Logistic regression coefficient estimates for grammar rules on WD10, FD10, and LD10 sequences, related to Figure 7.** Logistic regression models were computed for each set (WD10, FD10, LD10) to confirm the effect of the rules on functionality of ADs. Input values for each rule were calculated for each sequence and scaled as necessary to values between 0 and 1 (see methods, Logistic Regression). Output values represent average change in the log odds of a sequence being functional per unit increase in each rule value. All rules contribute to the functionality prediction for all three sets ( $p < 0.001$ ). Negative values for balance and clustering represent that sequences with larger values for these rules are less likely to be functional.
